# Supplementary material
Source: HighWire-hosted journal article supplement (http://rc.rcjournal.com/highwire/filestream/15475/field_highwire_adjunct_files/0/suppl.pdf)
Supplement: suppl.pdf [file suppl.pdf]

## NONINVASIVE VENTILATION PROTOCOL FOR TRANSPORT

### INDICATIONS AND CONTRAINDICATIONS:

#### **a) INDICATIONS:**

Respiratory failure type I (hypoxemic) with  $S/F < 240$  or with moderate dyspnea

Respiratory failure type II (hypoventilation):

- Moderate dyspnea after initial treatment (including HFNC)
- Severe dyspnea
- Symptomatic apneas (hypoxemic and bradycardic patients with a low respiratory rate)

| Respiratory failure Type I:                                                                                                                        | Respiratory failure Type II:                                                                                                                                                                                                                        |
|----------------------------------------------------------------------------------------------------------------------------------------------------|-----------------------------------------------------------------------------------------------------------------------------------------------------------------------------------------------------------------------------------------------------|
| <ul style="list-style-type: none"><li>▪ Pneumonia with hypoxemia</li><li>▪ Cardiac acute pulmonary edema (APE)</li><li>▪ Non-cardiac APE</li></ul> | <ul style="list-style-type: none"><li>▪ Apnea</li><li>▪ Bronchiolitis</li><li>▪ Asthma</li><li>▪ Neuromuscular patient with ARF</li><li>▪ Cystic fibrosis</li><li>▪ Home ventilation patient with a deterioration in respiratory function</li></ul> |

Use Wood-Downes score for asthma, and BROSJOD score for bronchiolitis

#### **b) CONTRAINDICATIONS:**

##### **General contraindications**

- Patient with undrained pneumothorax, bullous pneumopathy, vocal cord paralysis.
- Patient with hemodynamic instability
- Patient with Glasgow Coma Scale  $\leq 12$ , or progressive decrease
- Patient with active digestive bleeding, recent gastric or esophageic surgery, vomiting or bowel obstruction
- Patient with sinus infection, pneumoencephalus in CT scan, facial trauma

##### **Specific contraindications for NIV in transport**

- Patient with NIV in the emergency room, without appropriate improvement on arrival of transport team
- Patient with inappropriate management of secretions
- Patient with  $S/F < 150$  at 30 minutes if ARDS is suspected
- Patient requiring settings above IPAP 18/ EPAP 8 and  $FiO_2 > 0.60$ , or CPAP 10, before leaving the referring hospital (15- 30 minutes on NIV)
- No improvement in work of breathing after 15-30 minutes on NIV
- Upper airway obstruction (laryngitis, foreign body)
- Patient who is not collaborative/poorly synchronized in spite of sedation

## **MATERIAL:**

### **a) INTERFACES:**

#### **Interfaces age < 6 months:**

- Nasal prongs
- Nasopharyngeal tube (NT)

#### **Interfaces age > 6 months:**

- Oronasal NON VENTED without anti-asphyxia valve

### **Other complementary material**

- wide variety of sizes of headgear
- nebulizing device and connector
- T-piece to add oxygen to home ventilators without blender
- exhalation port if using non-vented mask with home ventilator
- Plateau valve: for hypercapnic patients

### **b) VENTILATORS AND MODES:**

#### **Oxylog 3000:**

- patients weighing >10kg
- Mode CPAP +/- ASB
- Activate NIV option on the screen
- Minimum inspiratory trigger of 3 liters per minute
- No rescue breaths for apneic patients

#### **Crossvent 2+**

- Patients weighing < 10 kg
- No NIV option → no leak compensation
- Set continuous flow
- CPAP preferably used
- When using PC: set Ti and RR close to patients' needs

#### **Home ventilator (Patient's ventilator)**

- Set Clinical mode to modify parameters
- Add oxygen in ventilators without blender (T-piece)
- Use patient's interface except if severe hypoxemia is present

## **APPLYING THE PROTOCOL:**

### **HOW TO PREPARE YOUR PATIENT:**

- Explain the procedure to the parents and older children
- Explore the child, check IV access, and perform preliminary treatments/procedures
- Transfer and monitor the patient
- Set the initial NIV parameters
- Put the headgear on, protect the skin and fit the interface (with oxygen attached to prevent desaturation)
- Connect the tubing
- Adjust the interface according to leaks and optimize comfort.
- Modify the settings to decrease the patient's work of breathing
- Consider pacifier when using NT or nasal prongs.
- Consider nasogastric tube to prevent gastric distension and aspirate stomach contents if: previous feeding within 2 hours, high respiratory support (IPAP>16), neurological or muscular disease or transport time > 2 hours.

### **SEDATION:**

#### **When we should use it:**

- Before beginning NIV if the patient is agitated or difficult to calm
- After beginning NIV if the patient is not comfortable or if we observe asynchrony (especially with Crossvent ventilator)

#### **Sedatives and dosage:**

- Propofol: 1 mg/kg/h after bolus of 1 mg/kg intravenous
- Levomepromazine: 0.5-1 mg/kg oral
- Ketamine: 5-10 mcg/kg/min + Midazolam 0.05-0.1 mg/kg/h intravenous

## **RESPIRATORY SUPPORT**

**NIV for apneas:** Use NIV if CPAP is not enough

**NIV for hypoxemic patients (pneumonia):** Use CPAP if the patient does not have significant work of breathing. For significant work of breathing, use NIV. Do not transport patients with a S/F <150 if ARDS is a possible diagnosis.

### **NIV for bronchiolitis**

Consider CPAP: If BROSJOD score > 8 after optimized treatment, or oxygen flow > 2 liters/min.

Consider NIV: If BROSJOD score > 10 after optimized treatment, or FiO<sub>2</sub> > 0.4 with CPAP.

**NIV for status asthmaticus:** Consider NIV if WD Score >8 after initial treatment (nebulizations and corticoids).

**BROSJOD score:**

|                                                                       |           |                                                                                                                                              |         |                                                                                                  |       |
|-----------------------------------------------------------------------|-----------|----------------------------------------------------------------------------------------------------------------------------------------------|---------|--------------------------------------------------------------------------------------------------|-------|
| <b>Wheezes/rales</b>                                                  |           | 0: no<br>1: expiratory wheezes or inspiratory rales<br>2: expiratory and inspiratory wheezes or rales                                        |         |                                                                                                  |       |
| <b>Indrawing</b>                                                      |           | 0: no<br>1: subcostal + lower intercostal<br>2: previous + supraclavicular + nasal flaring<br>3: previous + upper intercostal + tracheal tug |         |                                                                                                  |       |
| <b>Air entry</b>                                                      |           | 0: normal<br>1: regular and symmetric<br>2: asymmetric<br>3: very reduced                                                                    |         |                                                                                                  |       |
| <b>SpO<sub>2</sub></b>                                                |           | Without O <sub>2</sub><br>0: $\geq 95\%$<br>1: 91-94%<br>2: $\leq 90\%$                                                                      |         | With O <sub>2</sub><br>1: $> 94\%$ with $FiO_2 \leq 0.4$<br>2: $\leq 94\%$ with $FiO_2 \geq 0.4$ |       |
| <b>RR</b>                                                             |           | 0                                                                                                                                            | 1       | 2                                                                                                | 3     |
|                                                                       | < 3m      | < 40                                                                                                                                         | 40-59   | 60-70                                                                                            | > 70  |
|                                                                       | 3-12m     | < 30                                                                                                                                         | 30-49   | 50-60                                                                                            | > 60  |
|                                                                       | 12-24m    | < 30                                                                                                                                         | 30-39   | 40-50                                                                                            | > 50  |
| <b>HR</b>                                                             | < 1 year  | < 130                                                                                                                                        | 130-149 | 150-170                                                                                          | > 170 |
|                                                                       | 1-2 years | < 110                                                                                                                                        | 110-119 | 120-140                                                                                          | > 140 |
| <b>Mild: 0-6      moderate: 7-9      severe: <math>\geq 10</math></b> |           |                                                                                                                                              |         |                                                                                                  |       |

SpO<sub>2</sub>: hemoglobin saturation; RR: respiratory rate; HR: heart rate; O<sub>2</sub>: oxygen; FiO<sub>2</sub>: fraction of inspired oxygen; m: months

**Wood-Downes score (modified by Ferrés)**

|   | <b>Wheezes</b>                | <b>Indrawing</b>                                  | <b>RR</b> | <b>HR</b> | <b>Air entry</b>         | <b>Oxygen</b> |
|---|-------------------------------|---------------------------------------------------|-----------|-----------|--------------------------|---------------|
| 0 | No                            | No                                                | < 30      | <120      | Normal,<br>symmetric     | No            |
| 1 | Final expiratory              | subcostal + lower<br>intercostal                  | 31-45     | >129      | regular and<br>symmetric | Yes           |
| 2 | expiratory                    | previous +<br>supraclavicular +<br>nasal flaring  | 46-60     |           | very reduced             |               |
| 3 | expiratory and<br>inspiratory | previous + upper<br>intercostal +<br>tracheal tug | > 60      |           | Silence thorax           |               |

**mild =1-3      moderate = 4-7      severe = 8-14**

RR: respiratory rate; HR: heart rate
